**CORRECTION**

# Correction: Epigenetic resetting of human pluripotency (doi:10.1242/dev.146811)

**Ge Guo, Ferdinand von Meyenn, Maria Rostovskaya, James Clarke, Sabine Dietmann, Duncan Baker, Anna Sahakyan, Samuel Myers, Paul Bertone, Wolf Reik, Kathrin Plath and Austin Smith**

There were errors in Development (2017) **144**, 2748-2763 (doi: 10.1242/dev.146811).

Several images were inadvertently duplicated in Fig. 1F and Fig. S1E. All the original data for these figures were reviewed by the journal and the correct panels are shown below.

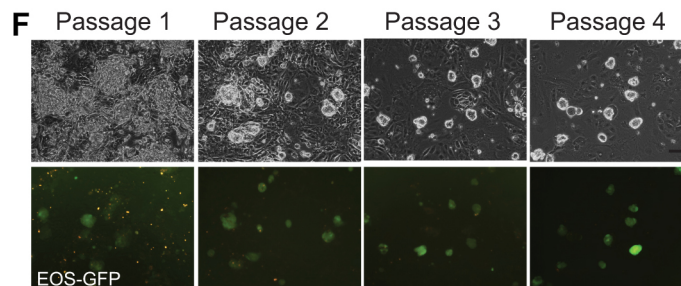

**Fig. 1. Resetting human pluripotent stem cells (hPSCs) with HDAC inhibitors.** (F) Images of reset S6EOS cultures over the first four passages. Scale bar: 100  $\mu$ m.

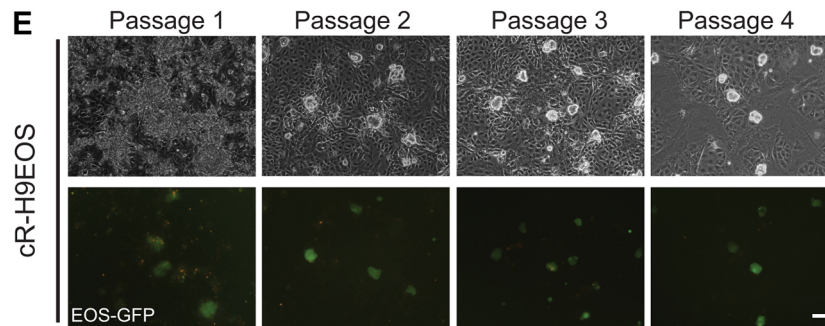

**Fig. S1.** (E) Images of first four passages of reset H9EOS cultures. Scale bar: 100  $\mu$ m.

This error does not affect the conclusions of the paper. The authors apologise to readers for any confusion caused.
